# Supplementary material
Source: PubMed Central journal article supplement (PMC1489300)

**Supplemental Data Table 1. Primers used in the study.**

| <i>Purpose</i>                        | <i>Primer name</i>   | <i>Sequence<sup>a</sup></i>                               |                                                                                                         |
|---------------------------------------|----------------------|-----------------------------------------------------------|---------------------------------------------------------------------------------------------------------|
| <b>Mutagenesis</b>                    | ITR-L                | 5'-CGTCGACCAATCATTGGAAGGTTGGTAC-3' (F)                    |                                                                                                         |
|                                       | ITR-R                | 5'-CGTCGACTCGCTCTTGAAGGGAAGTATG-3' (R)                    |                                                                                                         |
| <b>GFP tagging</b>                    | FusGfp-BasA          | 5'-GGT AAC TGG TGG TGA TGT CTT TAA TTA ACA G-3' (F)       |                                                                                                         |
|                                       | FusGfp-BasB          | 5'-GGA ACA GAT GCG GCC ATT TTG TAT AGT TCA TCC ATG-3' (R) |                                                                                                         |
| <b>Bas1-binding domain expression</b> | Bas1-F               | 5'-GCA TAT GGC CGC ATC TGT TCC G-3' (F)                   |                                                                                                         |
|                                       | Bas1-R               | 5'-CAC TCG AGT CAT CAG CGG CCG CCG GGA ATG CC-3' (R)      |                                                                                                         |
| <b>Real time PCR</b>                  | ACT1-5'              | 5'-CGC TAT ACT CTT CTG GTA G-3' (F)                       |                                                                                                         |
|                                       | ACT1-3'              | 5'-GAG AGG CCA AGA TAG AAC C-3' (R)                       |                                                                                                         |
|                                       | PRS1-5'              | 5'-CGA AAG TAT CCG TGA TGA AG-3' (F)                      |                                                                                                         |
|                                       | PRS1-3'              | 5'-CGG CGA CAT CAC CCA CCA AC-3' (R)                      |                                                                                                         |
|                                       | PRS2-5'              | 5'-ATGGCTACTAATGCAATCAAG-3' (F)                           |                                                                                                         |
|                                       | PRS2-3'              | 5'-GAAGCAAAATCATAGTGGGTTG-3' (R)                          |                                                                                                         |
|                                       | IMD1-5'              | 5'-CCT CCA AGT CTG CCG ACA CC-3' (F)                      |                                                                                                         |
|                                       | IMD1-3'              | 5'-CGT CCC TGA AGA AGT ACT CG-3' (R)                      |                                                                                                         |
|                                       | ADE4-5'              | 5'-GCA TAT GTG TGG CTA TTT AGG C-3' (F)                   |                                                                                                         |
|                                       | ADE4-3'              | 5'-CGG GAT CCT AAT AGT CGG CAG AA-3' (R)                  |                                                                                                         |
|                                       | SHM2-5'              | 5'-GCT GAT TGC GTC GGA GAA C-3' (F)                       |                                                                                                         |
|                                       | SHM2-3'              | 5'-GAT GTC GGC GTA CTC GAA G-3' (R)                       |                                                                                                         |
|                                       | RIB1-5'              | 5'-CTC CAT CTA TAC CAC AAC TC -3' (F)                     |                                                                                                         |
|                                       | RIB1-3'              | 5'-CGT CCG CAG GGT GGT TGA GC-3' (R)                      |                                                                                                         |
|                                       | RIB2-5'              | 5'-GCT AAG ACG CAG TTC AAA AG-3' (F)                      |                                                                                                         |
|                                       | RIB2-3'              | 5'-CCC ATT AAC TAA CAG GGC AC-3' (R)                      |                                                                                                         |
|                                       | RIB3-5'              | 5'-GCA TTT ATG ATT CGG TAT TC-3' (F)                      |                                                                                                         |
|                                       | RIB3-3'              | 5'-CGT TGC CGT CTA CTG CTT GG-3' (R)                      |                                                                                                         |
|                                       | RIB4-5'              | 5'-GAT TAA GGG ATT AGG CGA AG-3' (F)                      |                                                                                                         |
|                                       | RIB4-3'              | 5'-CAC TTC TTC ATT TGT TCG GC-3' (R)                      |                                                                                                         |
|                                       | RIB5-5'              | 5'-GGT ATA GTG GAA CAC ATT GG-3' (F)                      |                                                                                                         |
|                                       | RIB5-3'              | 5'-CTG CTT CTC TAC TAG CTT GC-3' (R)                      |                                                                                                         |
|                                       | RIB7-5'              | 5'-GCT AAT ACC ACT TTC TCA AG-3' (F)                      |                                                                                                         |
|                                       | RIB7-3'              | 5'-CCA GGT GGT GCT CAG AAT AG-3' (R)                      |                                                                                                         |
|                                       | <b>BIRD deletion</b> | Bas1-F3                                                   | 5'-CTG CCG GTT CTG GCA AGG CAG ATC TCT CCG AGC TTA GCC CGC AAC GCA AGT GAG GCG CGC CAC TTC TAA A-3' (F) |
|                                       |                      | Bas1-R1                                                   | 5'-GCT GGG GTT ATA GGG AAG TCC ACG GTA CGG TTC GCC CGC AGT CCA AGA ATG AAT TCG AGC TCG TTT AAA-3' (R)   |
|                                       |                      | A1 sense                                                  | 5'-GCA TGC ATA GAC GTC TGA CTA GA-3'                                                                    |
|                                       |                      | A1 antisense                                              | 5'-AAT CTC TAG TCA GAC GTC TAT GC-3'                                                                    |

**Supplemental Data Table 1. Continued.**

| <i>Purpose</i>              | <i>Primer name</i> | <i>Sequence<sup>a</sup></i>                                            |
|-----------------------------|--------------------|------------------------------------------------------------------------|
| <b><i>BIRD deletion</i></b> | A2 sense           | 5'-GAG ATT ATA TAA TAA CCC TCG AGC CAA AAT TAT<br>ACG GCG CTA ACA A-3' |
|                             | A2 antisense       | 5'-TTA CTT GTT AGC GCC GTA TAA TTT GGC TCG AGG GTT<br>ATT ATA TAA-3'   |
|                             | A3 sense           | 5'-AGT TAC TTT TCT GAC TTC TCT ACG CTG ACT TCT CTA<br>CCC TTC TAA-3'   |
|                             | A3 antisense       | 5'-CTA TGT TAG AAG GGT AGA GAA GCT AGC GTA GAG<br>AAG TCA GAA AAG-3'   |

<sup>a</sup>Sequences of forward (F) and reverse (R) primers.



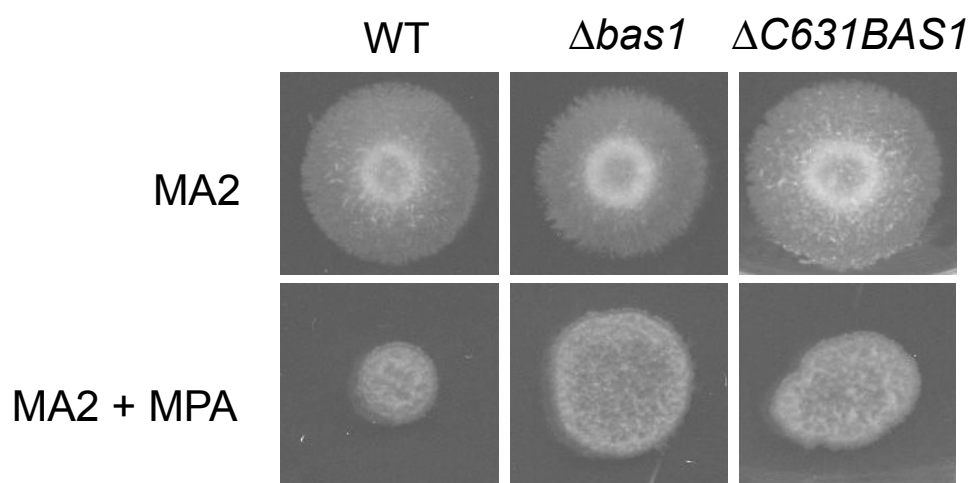

Supplement: aem_72_7_5052__1.pdf [file aem_72_7_5052__1.pdf]
